### Prognostic role of left ventricular late gadolinium enhancement (LV-LGE) in patients who received implantable cardioverter defibrillator (ICD) for secondary prevention

G. Mattesi<sup>1</sup>, E. Baldi<sup>2</sup>, F. Guerra<sup>3</sup>, M. Toniolo<sup>4</sup>, A. Cipriani<sup>1</sup>, F. Cauti<sup>5</sup>, L. Marcantoni<sup>6</sup>, M. Manfrin<sup>7</sup>, C. Lanzillo<sup>8</sup>, S. Savastano<sup>2</sup>, A. Zorzi<sup>1</sup>

<sup>1</sup>University of Padova, Department of Cardiac, Thoracic and Vascular sciences, Padua, Italy; <sup>2</sup>Policlinic Foundation San Matteo IRCCS, Pavia, Italy; <sup>3</sup>Marche Polytechnic University of Ancona, Ancona, Italy; <sup>4</sup>University Hospital Santa Maria della Misericordia, Udine, Italy; <sup>5</sup>San Giovanni Calibita Hospital, Roma, Italy; <sup>6</sup>Santa Maria della Misericordia Hospital, Rovigo, Italy; <sup>7</sup>Central Hospital, Bolzano, Italy; <sup>8</sup>Policlinico Casilino, Roma, Italy

**Funding Acknowledgement:** Type of funding source: None

**Introduction:** LV myocardial fibrosis detected as LGE on cardiac magnetic resonance (CMR) is a predictor of arrhythmic risk in primary prevention both in ischaemic and non-ischaemic cardiomyopathy. However, we still do not know the prognostic role of LV-LGE in patients who suffered cardiac arrest (CA).

**Purpose:** To evaluate the prognostic role of CMR, and in particular of LV-LGE suggesting myocardial scar, in predicting appropriate ICD interventions in secondary prevention patients.

**Methods:** Ninety-seven consecutive patients 1) aged  $\geq 14$  years 2) hospitalized for CA because of ventricular arrhythmias from 2009/01/01 3) who underwent/undergoing a CMR within one month from the event 4) who received/receiving an ICD for secondary prevention and 5) with at least 1 year-follow-up, were enrolled for this multicentric study.

**Results:** 97 patients (68 males, 70%), mean age  $46 \pm 16$  years, were en-

rolled. Seventy-six percent of patients received bystander cardiopulmonary resuscitation (CPR) and ventricular fibrillation (VF) was the first rhythm in 86% of cases. ST elevation was present in 18% of cases at the admission; however, angiography was found negative in 80% of patients. Myocardial oedema and LGE were identified in 26% and 64% of patients respectively. A diagnosis was made in 83.5% of cases, while in the remaining 16.5% CA was considered idiopathic. During a four-year-follow-up, 25% of patients had appropriate ICD therapy (10% of which ATP only). A significant correlation between LGE and appropriate ICD intervention was not found ( $p=0.89$ ).

**Conclusions:** One fourth of patients who received ICD for secondary prevention had appropriate ICD therapy during a four-year-follow-up. In this setting, LV-LGE does not provide a prognostic value.

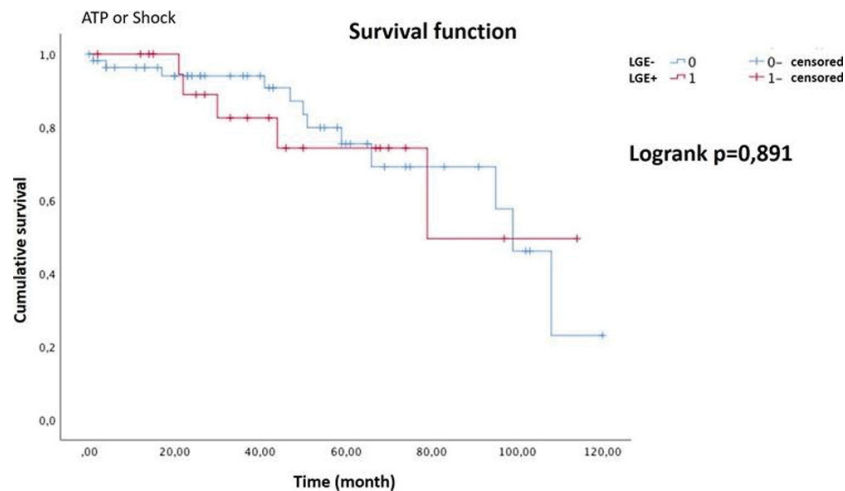

Source: http://academic.oup.com/eurheartj/article-pdf/41/Supplement_2/ehaa946.0457/34514610/ehaa946.0457.pdf
